# Supplementary material
Source: PubMed Central journal article supplement (PMC1955747)
Supplement: hesr0042-0311-s1.pdf [file hesr0042-0311-s1.pdf]

Appendix A.1 Comparison of research papers, presentations, and posters – materials and audience interaction

|                          | Research paper <sup>a</sup>                                                                                                       | 20-minute oral conference presentation                                                                                                                                          | 4' by 8' poster presentation                                                                                                                                                                                                                                                                             |
|--------------------------|-----------------------------------------------------------------------------------------------------------------------------------|---------------------------------------------------------------------------------------------------------------------------------------------------------------------------------|----------------------------------------------------------------------------------------------------------------------------------------------------------------------------------------------------------------------------------------------------------------------------------------------------------|
| <b>Written materials</b> |                                                                                                                                   |                                                                                                                                                                                 |                                                                                                                                                                                                                                                                                                          |
| Form                     | Printed document (paper or web).                                                                                                  | Slides or overhead transparencies                                                                                                                                               | Poster pages                                                                                                                                                                                                                                                                                             |
| Length                   | <ul style="list-style-type: none"> <li>• 12-16 pages (research brief)</li> <li>• 20-25 pages (full length article)</li> </ul>     | Average of 1 slide/minute <ul style="list-style-type: none"> <li>• Less time for text slides</li> <li>• More time for table/chart slides</li> </ul>                             | <ul style="list-style-type: none"> <li>• 12 pages (tri-fold presentation board)</li> <li>• 15-20 pages (4' by 8' bulletin board)</li> </ul>                                                                                                                                                              |
| Style                    | Full sentences and paragraphs; formal essay structure.                                                                            | <ul style="list-style-type: none"> <li>• Bulleted phrases replace full sentences (see Fink 1995)</li> <li>• Charts and tables simplified from research paper version</li> </ul> | <ul style="list-style-type: none"> <li>• Full paragraphs in abstract.</li> <li>• Bulleted sentences in introduction and conclusion</li> <li>• Bulleted phrases replace full sentences in data &amp; methods &amp; results</li> <li>• Charts and tables simplified from research paper version</li> </ul> |
| Type size                | 12-point                                                                                                                          | <ul style="list-style-type: none"> <li>• Slides titles: 24 point or larger</li> <li>• Text: 18 point or larger</li> </ul>                                                       | <ul style="list-style-type: none"> <li>• Poster title: 40 point or larger</li> <li>• Page titles: 20 point or larger</li> <li>• Text: 14-16 point</li> </ul>                                                                                                                                             |
| Color                    | Black type on white background                                                                                                    | Dark background with light main text<br>OR clear/pale background with dark text.<br>Contrasting color for emphasis (e.g., statistical significance)                             | Clear or pale colored background<br>Dark color for most text.<br>Contrasting color for emphasis (e.g., statistical significance)                                                                                                                                                                         |
| Other formatting         | Use subheadings to guide readers within sections (e.g., naming subtopics within the introduction, literature review, or results). | Use slide titles to guide viewers, integrating specific topic, purpose, or finding of each slide.                                                                               | Use page titles to guide viewers, integrating specific topic, purpose, or finding of each page.                                                                                                                                                                                                          |

<sup>a</sup> Following *Health Services Research* guidelines for authors.

| Appendix A, continued                   | Research paper                                 | 20-minute oral conference presentation                                                                                                                                                                                                                                                                                                   | 4' by 8' poster presentation                                                                                                                                                                                                                                                                                                                                             |
|-----------------------------------------|------------------------------------------------|------------------------------------------------------------------------------------------------------------------------------------------------------------------------------------------------------------------------------------------------------------------------------------------------------------------------------------------|--------------------------------------------------------------------------------------------------------------------------------------------------------------------------------------------------------------------------------------------------------------------------------------------------------------------------------------------------------------------------|
| <b><u>Spoken materials</u></b>          | Not applicable                                 | Speaker's notes: Either full narrative script or selected reminders, coordinated with slides. See Miller (2005), chapter 15.                                                                                                                                                                                                             | Few sentences summarizing main objectives and findings, spoken to each viewer.<br>Brief modules about each major section of the poster, <sup>b</sup> to be chosen from in response to questions from individual viewers.<br>Few questions to ask viewers to solicit reactions to your findings, ideas for additional questions, or names of others working on the topic. |
| <b><u>Handouts</u></b>                  | Not applicable                                 | Handout of slides, copied several to a page. <sup>c</sup><br>Abstract and detailed tables may be distributed for longer seminars.                                                                                                                                                                                                        | Abstract + handout of slides, copied several to a page.<br>OR copy of the complete research paper.                                                                                                                                                                                                                                                                       |
| <b><u>Interaction with audience</u></b> | Occasional email, phone, or in-person queries. | Questions and discussion from the audience. <ul style="list-style-type: none"> <li>• Usually quite limited in a multi-paper conference session.</li> <li>• Can be extensive during a longer individual seminar.</li> </ul> Questions from individual audience members after the session, where responses can be tailored to each person. | One-on-one discussion with viewers, tailored in response to questions and responses from each viewer; see "spoken materials" above.<br>Potentially extensive, depending on interests of viewers.                                                                                                                                                                         |

<sup>b</sup> Create separate 1-2 minute modules for: background, literature review, data and methods, results, conclusions, research implications & policy implications.

<sup>c</sup> Presentation software (e.g., PowerPoint) can automatically format such handouts.

Appendix A.2 Comparison of research papers, presentations, and posters – contents

|                   | Research paper                                                                                                                                                            | 20-minute oral conference presentation <sup>a, b</sup>                                                                                                                                                                       | 4' by 8' poster presentation                                                                                                                                       |
|-------------------|---------------------------------------------------------------------------------------------------------------------------------------------------------------------------|------------------------------------------------------------------------------------------------------------------------------------------------------------------------------------------------------------------------------|--------------------------------------------------------------------------------------------------------------------------------------------------------------------|
| Abstract          | Yes                                                                                                                                                                       | No                                                                                                                                                                                                                           | Yes                                                                                                                                                                |
| Introduction      | Several pages of background on issue and its importance, ending with statement of research question or hypotheses.                                                        | 1-2 slides of background on issue and its importance.<br>One slide stating research question or hypotheses.                                                                                                                  | 1-2 pages of background on issue and its importance, ending with statement of research question or hypotheses.                                                     |
| Literature review | Detailed review and summary of previous studies on similar topics and methods.                                                                                            | 1-2 slides of few key studies only, either as tabular summary or bulleted text. More detail possible for longer seminars.                                                                                                    | 1 page, focusing on main points from few key articles and identifying gaps in the literature.                                                                      |
| Data and methods  | Comprehensive, detailed information on data sources, study design, variables, and statistical methods. May include equations.                                             | 3-4 slides presenting only essential information on data sources, study design, variables, and statistical methods.                                                                                                          | 2-3 pages presenting essential information on data sources, study design, variables, and statistical methods.                                                      |
| Results           | Detailed statistical tables and charts accompanied by prose descriptions written in paragraph form.                                                                       | 4-5 slides with simplified tables and charts, either accompanied by bulleted text annotations or described in speaker's notes. One major result or set of related results per slide – reflected in slide title.              | 4-5 pages of simplified tables and charts accompanied by bulleted text annotations. One major result or set of related results per page – reflected in page title. |
| Conclusions       | Several pages relating findings to research question and to related studies, discussing study strengths and limitations, and describing research and policy implications. | One slide each of bulleted text on <ul style="list-style-type: none"> <li>• Summary of key findings</li> <li>• Policy implications</li> <li>• Directions for future research</li> <li>• Strengths and limitations</li> </ul> | 2-3 pages summarizing key findings, discussing study strengths and limitations, and describing implications for research, policy, and practice.                    |

<sup>a</sup> Assumes a professional research audience such as persons attending the *AcademyHealth* Annual Research Conference. For lay audiences, reduce emphasis on data, methods, statistical results, and research implications; increase emphasis on purpose, findings, and policy implications. See Miller (2005), chapter 16.

<sup>b</sup> For a longer presentation or seminar, increase sections proportionately.
