# Supplementary material
Source: PubMed Central journal article supplement (PMC1955747)

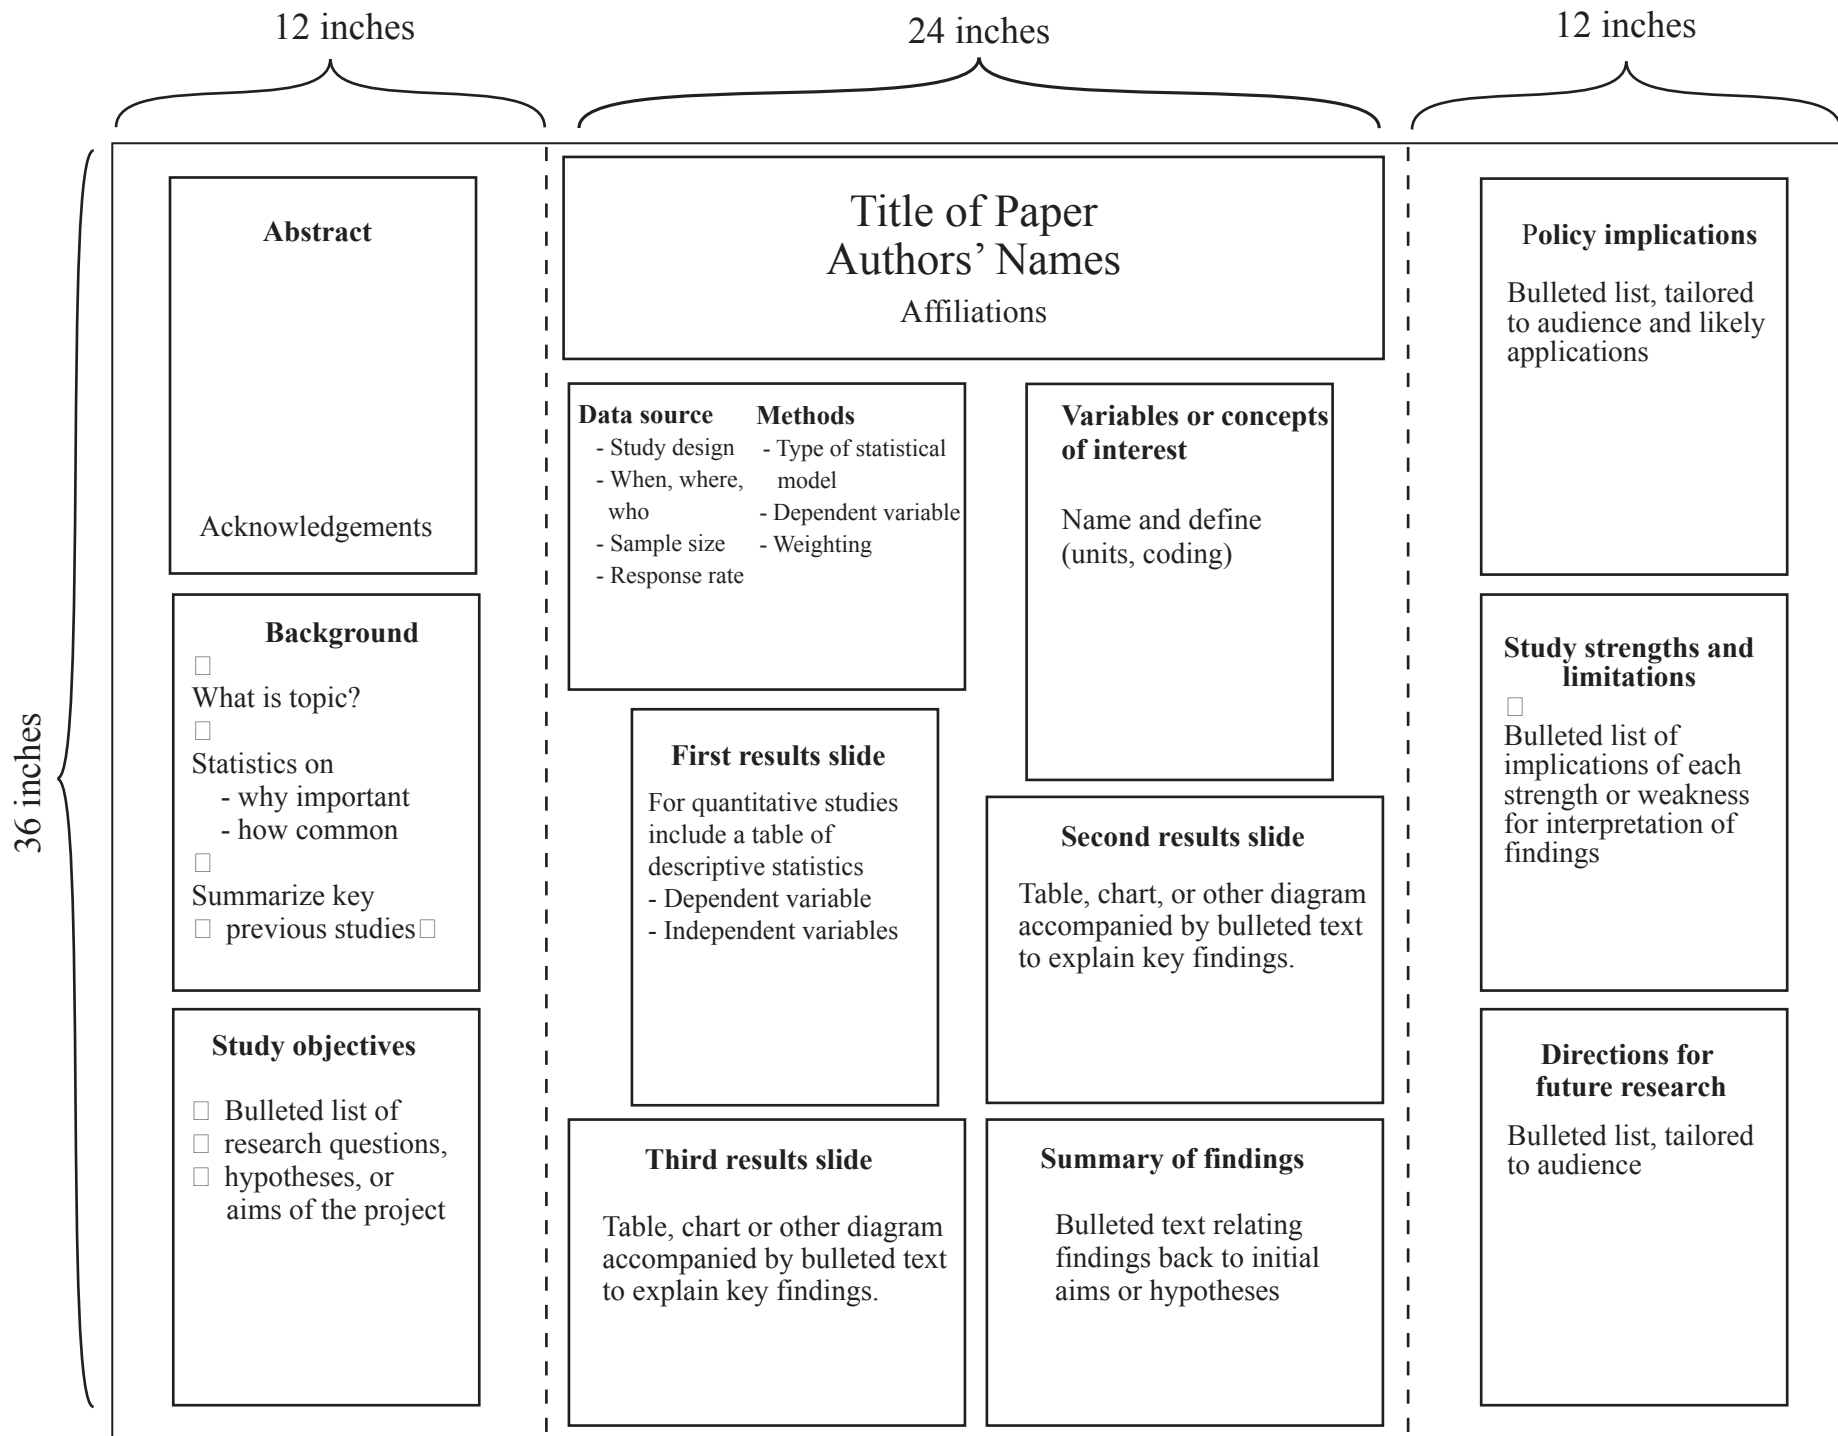

**Appendix B. Suggested layout for a tri-fold presentation board**

Supplement: hesr0042-0311-s2.pdf [file hesr0042-0311-s2.pdf]
